# Supplementary material
Source: PubMed Central journal article supplement (PMC3122248)
Supplement: supp_M111.230706_jbc.M111.230706-1.pdf [file supp_M111.230706_jbc.M111.230706-1.pdf]

Supplementary materials for

Structure of the autocatalytic cysteine protease domain of potyvirus  
helper-component proteinase

Bihong Guo, Jinzhong Lin and Keqiong Ye

Include 1 figure

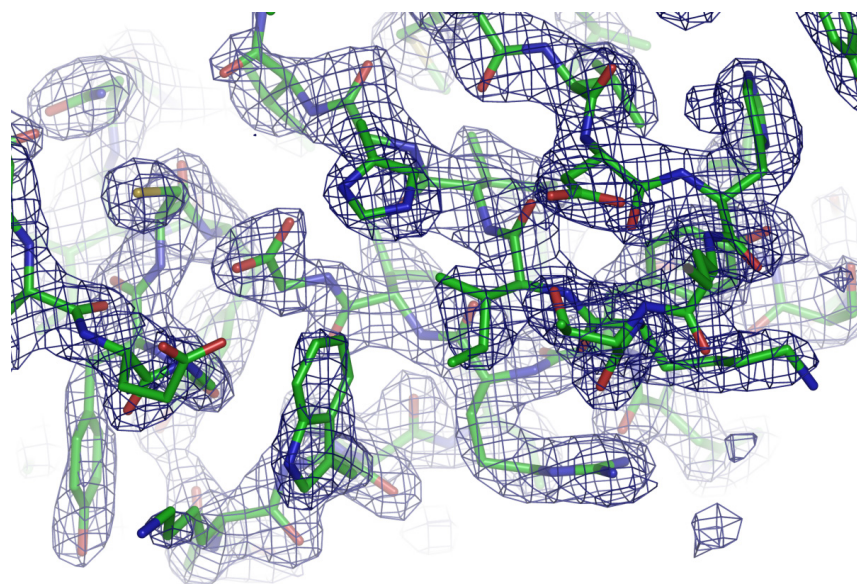

Figure S1. The  $2f_o-f_c$  electron density map contoured at the  $1.5 \sigma$  level. The view is the same as Fig 2B.
